# Supplementary material
Source: PubMed Central journal article supplement (PMC2787158)
Supplement: 0905139106_0905139106SI.pdf [file 0905139106_0905139106SI.pdf]

# Supporting Information

Bogunovic et al. 10.1073/pnas.0905139106

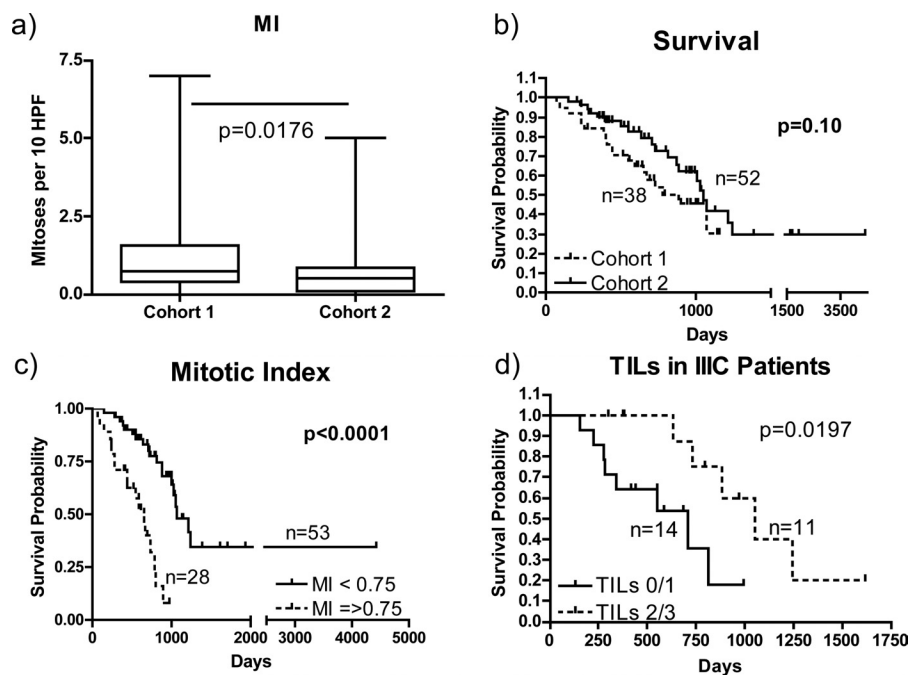

**Fig. S1.** MI aids staging in combined initial and validation patient cohorts in predicting their survival. Fifty-two additional patient samples with stage IIIb and IIIC were examined for MI and TILs. They had significantly lower MI (A) ( $P = 0.0176$ ) and longer overall survival (B) ( $P = 0.10$ ) than the initial cohort. When the initial and validation cohort were combined ( $n = 90$ ) MI was a significant predictor of survival (C) ( $P < 0.0001$ ). TILs were significant predictor of survival (D) ( $P = 0.0197$ ) only in IIIC patients in the validation cohort.

**Table S1. Patients' characteristics and stage at tissue retrieval**

| Sex | Age (rec) | Treatment                   | Status     | Stage at retrieval |
|-----|-----------|-----------------------------|------------|--------------------|
| M   | 87*       | Surgery, Chemo              | Alive, NED | IIIB, IIIB         |
| M   | 79        | Surgery, XRT                | Alive, MM  | IIIC               |
| M   | 56        | Surgery                     | Alive, NED | IIIB               |
| F   | 84        | Chemo                       | Died, MM   | IV (1b)            |
| M   | 51        | Surgery, XRT, Chemo         | Died, MM   | IIIC               |
| M   | 35        | Surgery, Chemo, XRT, Immuno | Died, MM   | IIIB               |
| M   | 86*       | Surgery, Immuno, Chemo      | Died, MM   | IIIB, IV (1c)      |
| M   | 51        | Surgery, XRT                | Alive, NED | IIIC               |
| F   | 49        | Surgery, Chemo              | Alive, MM  | IIIA               |
| F   | 90        | Surgery                     | Died, MM   | IIIB               |
| F   | 49        | N/A                         | Died, MM   | IV (1c)            |
| M   | 54        | Surgery, Chemo              | Alive, NED | IIIC               |
| F   | 54        | Surgery                     | Alive, MM  | IIIB               |
| F   | 82        | Surgery, Chemo              | Alive, NED | IIIB               |
| M   | 60        | Surgery                     | Alive, NED | IIIB               |
| F   | 68        | Surgery, XRT                | Alive, MM  | IIIB               |
| F   | 48        | Surgery, XRT, Chemo         | Died, MM   | IIIB               |
| M   | 65        | N/A                         | Died, MM   | IIIC               |
| M   | 78*       | Surgery                     | Died, MM   | IIIB, IIIB         |
| F   | 40*       | Surgery, XRT                | Died, MM   | IIIB, IIIB, IIIB   |
| F   | 78        | Surgery, Chemo              | Died, MM   | IIIB               |
| M   | 74*       | N/A                         | Died, MM   | IIIC, IIIC         |
| M   | 69        | Surgery, Immuno             | Died, MM   | IV (1b)            |
| M   | 44        | Surgery                     | Alive, NED | IIIB               |
| M   | 43        | Surgery, Immuno             | Alive, NED | IIIC               |
| M   | 30        | Surgery, Chemo              | Alive, NED | IIIA               |
| M   | 60        | Surgery, XRT, Immuno        | Alive, NED | IIIA               |
| M   | 92        | Surgery                     | Died, MM   | IIIB               |
| M   | 83        | Surgery                     | Alive, MM  | IIIB               |
| F   | 50        | Surgery                     | Died, MM   | IIIC               |
| M   | 30        | Surgery                     | Died, MM   | IIIB               |
| F   | 38        | Surgery                     | Died, MM   | IV (1b)            |
| F   | 77        | Surgery, XRT                | Alive, NED | IIIA               |
| M   | 70        | Surgery, Chemo              | Alive, MM  | IIIB               |
| M   | 52        | Surgery                     | Died, MM   | IIIC               |
| M   | 79        | Surgery, XRT, Chemo         | Alive, NED | IIIB               |
| M   | 69        | Surgery                     | Alive, NED | IIIC               |
| F   | 77        | Surgery                     | Died, MM   | IIIC               |

Patient sex, age at disease recurrence (rec), treatment, status at the time of analysis, and stage are represented above.

\*Denotes patients with multiple samples, MM = metastatic melanoma, NED = no evidence of disease, XRT = radiation therapy, Chemo = chemotherapy.

**Table S2. Functional annotation clustering using DAVID**

| GO term identifier                           | Class                                                                | Count | P value  | Benjamini  |
|----------------------------------------------|----------------------------------------------------------------------|-------|----------|------------|
| Annotation Cluster 1 Enrichment Score: 13.42 |                                                                      |       |          |            |
| GOTERM_BP_ALL                                | Up-Regulated genes                                                   |       |          |            |
| GOTERM_BP_ALL                                | immune system process                                                | 40    | 1.10E-19 | 5.90E-16   |
| GOTERM_BP_ALL                                | immune response                                                      | 31    | 2.50E-14 | 6.50E-11   |
| GOTERM_BP_ALL                                | response to stimulus                                                 | 44    | 2.00E-08 | 2.10E-05   |
| Down-regulated genes                         |                                                                      |       |          |            |
| Annotation Cluster 1 Enrichment Score: 1.61  |                                                                      |       |          |            |
| SP_PIR_KEYWORDS                              | aminotransferase                                                     | 3     | 4.00E-03 | 9.90E-01   |
| GOTERM_MF_ALL                                | transaminase activity                                                | 3     | 9.10E-03 | 1.00E + 00 |
| INTERPRO                                     | Pyridoxal phosphate-dependent transferase, major region, subdomain 1 | 3     | 1.20E-02 | 1.00E + 00 |
| GOTERM_MF_ALL                                | transferase activity, transferring nitrogenous groups                | 3     | 1.20E-02 | 1.00E + 00 |
| GOTERM_MF_ALL                                | pyridoxal phosphate binding                                          | 3     | 2.60E-02 | 1.00E + 00 |
| SP_PIR_KEYWORDS                              | pyridoxal phosphate                                                  | 3     | 2.60E-02 | 1.00E + 00 |
| GOTERM_MF_ALL                                | vitamin binding                                                      | 3     | 1.20E-01 | 1.00E + 00 |
| GOTERM_MF_ALL                                | cofactor binding                                                     | 3     | 2.60E-01 | 1.00E + 00 |
| Annotation Cluster 2 Enrichment Score: 1.17  |                                                                      |       |          |            |
| GOTERM_BP_ALL                                | M phase                                                              | 7     | 1.20E-03 | 1.00E + 00 |
| GOTERM_BP_ALL                                | Mitosis                                                              | 6     | 2.50E-03 | 1.00E + 00 |
| GOTERM_BP_ALL                                | M phase of mitotic cell cycle                                        | 6     | 2.60E-03 | 9.90E-01   |
| GOTERM_BP_ALL                                | Cell cycle phase                                                     | 7     | 3.60E-03 | 9.90E-01   |
| GOTERM_BP_ALL                                | Mitotic cell cycle                                                   | 6     | 1.00E-02 | 1.00E + 00 |
| GOTERM_BP_ALL                                | Cell division                                                        | 5     | 1.90E-02 | 1.00E + 00 |
| SP_PIR_KEYWORDS                              | Mitosis                                                              | 4     | 2.00E-02 | 1.00E + 00 |
| GOTERM_BP_ALL                                | Cell cycle process                                                   | 8     | 3.60E-02 | 1.00E + 00 |
| SP_PIR_KEYWORDS                              | Cell division                                                        | 4     | 6.10E-02 | 1.00E + 00 |
| GOTERM_BP_ALL                                | Cell cycle                                                           | 8     | 7.70E-02 | 1.00E + 00 |
| SP_PIR_KEYWORDS                              | Cell cycle                                                           | 5     | 1.10E-01 | 1.00E + 00 |
| GOTERM_CC_ALL                                | Cytoskeletal part                                                    | 5     | 3.60E-01 | 1.00E + 00 |
| GOTERM_BP_ALL                                | Cytoskeleton organization and biogenesis                             | 4     | 3.80E-01 | 1.00E + 00 |
| GOTERM_BP_ALL                                | Regulation of progression through cell cycle                         | 4     | 3.80E-01 | 1.00E + 00 |
| GOTERM_BP_ALL                                | Regulation of cell cycle                                             | 4     | 3.80E-01 | 1.00E + 00 |
| GOTERM_CC_ALL                                | Microtubule cytoskeleton                                             | 3     | 5.10E-01 | 1.00E + 00 |
| GOTERM_CC_ALL                                | Cytoskeleton                                                         | 6     | 5.30E-01 | 1.00E + 00 |
| GOTERM_CC_ALL                                | Nonmembrane-bound organelle                                          | 8     | 7.40E-01 | 1.00E + 00 |
| GOTERM_CC_ALL                                | Intracellular non-membrane-bound organelle                           | 8     | 7.40E-01 | 1.00E + 00 |
| GOTERM_BP_ALL                                | Organelle organization and biogenesis                                | 5     | 7.40E-01 | 1.00E + 00 |

Table output from DAVID/National Institutes of Health program of the genes that are significantly associated with patient survival, representing top functional category of the upregulated genes, and the top two functional categories of the down-regulated genes.

**Table S3. Estimates of survival for groups based on TIL index, CD3 cell count, MI, and TNM stage (*N* = 38)**

|                                                                | Group ( <i>N</i> ) | Median survival (days) and 95% CI |
|----------------------------------------------------------------|--------------------|-----------------------------------|
| TIL index (% of cells within the tumor lesion, <i>N</i> = 31*) | 0–25 (12)          | 440 (237, NA)**                   |
|                                                                | 25–50 (10)         | 1,073 (590, NA)                   |
|                                                                | 50–100 (9)         | NA (887, NA)                      |
| CD3 cell count (cells per 10 HPF, <i>N</i> = 29*)              | ≤80 (14)           | 653 (440, NA)                     |
|                                                                | >80 (15)           | 1,073 (725, NA)                   |
| Mitotic index (mitoses per HPF, <i>N</i> = 30*)                | ≤0.75 (16)         | 1,073 (1,073, NA)                 |
|                                                                | >0.75 (14)         | 496 (237, NA)                     |
| TNM Stage (at time of surgery, <i>N</i> = 38)                  | IIIA (4)           | NA                                |
|                                                                | IIIB (18)          | 1,073 (725, NA)                   |
|                                                                | IIIC (11)          | 780 (440, NA)                     |
|                                                                | IV (5)             | 259 (92, NA)                      |

\*Indicates the number of nonmissing values for each measurement.

\*\*NA indicates that the estimate could not be obtained due to small sample size.





**Table S5. B. Clinical characteristics PV gene expression and MI**

|                                 |         | Low risk (N = 16)   | High risk (N = 16)  | Statistical test           |
|---------------------------------|---------|---------------------|---------------------|----------------------------|
| Sex                             | Female  | 6 (38%)             | 6 (38%)             | Fisher's P value = 1.00    |
|                                 | Male    | 10 (62%)            | 10 (62%)            |                            |
| Age at recurrence               |         | Mean = 65 (SD = 20) | Mean = 59 (SD = 20) | Wilcoxon rank sum P = 0.31 |
| CD3 cell count                  | <80     | 7 (44%)             | 9 (64%)             | Fisher's P value = 0.30    |
|                                 | ≥80     | 9 (56%)             | 5 (36%)             |                            |
|                                 | Missing | 0                   | 2                   |                            |
| Mitotic index                   | <0.75   | 11 (69%)            | 5 (31%)             | Fisher's P value = 0.08    |
|                                 | ≥0.75   | 5 (31%)             | 11 (69%)            |                            |
| TILs index                      | 0–25%   | 5 (31%)             | 9 (56%)             | Fisher's P value = 0.06    |
|                                 | 25–50%  | 4 (25%)             | 6 (38%)             |                            |
|                                 | 50–100% | 7 (44%)             | 1 (6%)              |                            |
| Stage at recurrence/ metastasis | IIIA    | 2 (12.5%)           | 0 (0%)              | Fisher's P value = 0.09    |
|                                 | IIIB    | 10 (62.5%)          | 7 (44%)             |                            |
|                                 | IIIC    | 4 (25%)             | 5 (31%)             |                            |
|                                 | IV      | 0 (0%)              | 4 (25%)             |                            |
| Radiation                       | Yes     | 4 (27%)             | 3 (20%)             | Fisher's P value = 1.00    |
|                                 | No      | 11 (73%)            | 12 (80%)            |                            |
|                                 | Missing | 1                   | 1                   |                            |
| Immunotherapy                   | Yes     | 0 (0%)              | 2 (13%)             | Fisher's P value = 0.48    |
|                                 | No      | 15 (100%)           | 13 (87%)            |                            |
|                                 | Missing | 1                   | 1                   |                            |
| Chemotherapy                    | Yes     | 8 (53%)             | 4 (27%)             | Fisher's P-Value = 0.26    |
|                                 | No      | 7 (47%)             | 11 (73%)            |                            |
|                                 | Missing | 1                   | 1                   |                            |

Clinical characteristics of low and high risk groups predicted based on a Cox multivariable regression model of survival since R/M as a dependent variable and the PV and MI as predictors (N = 32).

## Other Supporting Information Files

[Dataset S1 \(PDF\)](#)
