# Supplementary material
Source: PubMed Central journal article supplement (PMC2787158)
Supplement: 0905139106_SD1_PDF.pdf [file 0905139106_SD1_PDF.pdf]

| Probe # | AFFY ID(s)                            | Gene Symbol | Gene Title                                                                                                  | UniGene ID | FC     | q-value (%) | Top Functional Gene Category (DAVID) | Cells expressing                      | Notes and aliases                                                                                   |
|---------|---------------------------------------|-------------|-------------------------------------------------------------------------------------------------------------|------------|--------|-------------|--------------------------------------|---------------------------------------|-----------------------------------------------------------------------------------------------------|
| 1       | 236967_at                             | LOC645249   | hypothetical protein LOC645249                                                                              | Hs.224879  | -14.34 | 0.7         |                                      |                                       |                                                                                                     |
| 2       | 1568878_at                            | ---         | ---                                                                                                         | Hs.531359  | -6.90  | 1.2         |                                      |                                       |                                                                                                     |
| 3       | 205113_at                             | NEFM        | neurofilament, medium polypeptide 150kDa                                                                    | Hs.458657  | -4.20  | 2.8         |                                      |                                       |                                                                                                     |
| 4       | 220117_at                             | ZNF385D     | zinc finger protein 385D                                                                                    | Hs.21026   | 4.00   | 5.3         |                                      |                                       |                                                                                                     |
| 5       | 205242_at                             | CXCL13      | chemokine (C-X-C motif) ligand 13 (B-cell chemoattractant)                                                  | Hs.100431  | 3.93   | 3.6         | Immune system process                | leukocytes                            | BCA-1, B-cell chemoattractant                                                                       |
| 6       | 234180_at                             | ---         | ---                                                                                                         | Hs.540997  | -3.40  | 0.8         |                                      |                                       |                                                                                                     |
| 7       | 223750_s_at, 223751_x_at              | TLR10       | toll-like receptor 10                                                                                       | Hs.120551  | 2.91   | 4.2         | Immune system process                | leukocytes                            |                                                                                                     |
| 8       | 210072_at                             | CCL19       | chemokine (C-C motif) ligand 19                                                                             | Hs.50002   | 2.75   | 2.5         | Immune system process                | leukocytes                            |                                                                                                     |
| 9       | 217480_x_at                           | LOC339562   | similar to hCG1742442                                                                                       | Hs.449972  | 2.73   | 5.3         |                                      |                                       |                                                                                                     |
| 10      | 209663_s_at, 216331_at                | ITGA7       | integrin, alpha 7                                                                                           | Hs.524484  | -2.71  | 4.2         |                                      |                                       |                                                                                                     |
| 11      | 231236_at                             | ZFP57       | zinc finger protein 57 homolog (mouse)                                                                      | Hs.156326  | -2.62  | 3.6         |                                      |                                       |                                                                                                     |
| 12      | 237731_at                             | LOC154092   | hypothetical protein LOC154092                                                                              | Hs.223718  | -2.59  | 1.4         |                                      |                                       |                                                                                                     |
| 13      | 220245_at, 221644_s_at                | SLC45A2     | solute carrier family 45, member 2                                                                          | Hs.278962  | -2.46  | 1.9         |                                      |                                       |                                                                                                     |
| 14      | 213539_at                             | CD3D        | CD3d molecule, delta (CD3-TCR complex)                                                                      | Hs.504048  | 2.44   | 4.8         | Immune system process                | T cells                               |                                                                                                     |
| 15      | 1560030_at                            | LOC283692   | hypothetical protein LOC283692                                                                              | Hs.578667  | 2.43   | 4.2         |                                      |                                       |                                                                                                     |
| 16      | 231496_at                             | FCAMR       | Fc receptor, IgA, IgM, high affinity                                                                        | Hs.145519  | 2.39   | 3.6         |                                      |                                       |                                                                                                     |
| 17      | 206337_at                             | CCR7        | chemokine (C-C motif) receptor 7                                                                            | Hs.370036  | 2.37   | 3.6         | Response to stimulus                 | lymphocytes                           | CD197                                                                                               |
| 18      | 227030_at                             | ---         | ---                                                                                                         | Hs.371680  | 2.37   | 4.2         |                                      |                                       |                                                                                                     |
| 19      | 236301_at                             | ---         | ---                                                                                                         | Hs.371680  | 2.37   | 4.2         |                                      |                                       |                                                                                                     |
| 20      | 204890_s_at, 204891_s_at              | LCK         | lymphocyte-specific protein tyrosine kinase                                                                 | Hs.470627  | 2.37   | 4.2         | Immune system process                | T cells                               | A Src family pteirin tyrosine kinase                                                                |
| 21      | 205890_s_at                           | GABBR1      | gamma-aminobutyric acid (GABA) B receptor, 1 ubiquitin D                                                    | Hs.44532   | 2.34   | 3.6         |                                      |                                       |                                                                                                     |
| 22      | 209795_at                             | CD69        | CD69 molecule                                                                                               | Hs.208854  | 2.33   | 4.2         | Response to stimulus                 | lymphocytes                           |                                                                                                     |
| 23      | 204116_at                             | IL2RG       | interleukin 2 receptor, gamma (severe combined immunodeficiency)                                            | Hs.84      | 2.31   | 4.2         | Immune system process                | T cells                               | IL-2 receptor common gamma chain when expressed by hematopoietic cells acts as an allergic mediator |
| 24      | 211663_x_at, 212187_x_at, 211748_x_at | PTGDS       | prostaglandin D2 synthase 21kDa (brain)                                                                     | Hs.446429  | 2.28   | 3.6         | Response to stimulus                 | multiple                              |                                                                                                     |
| 25      | 206641_at                             | TNFRSF17    | tumor necrosis factor receptor superfamily, member 17                                                       | Hs.2556    | 2.26   | 4.2         | Immune system process                | B cells                               | CD269                                                                                               |
| 26      | 205831_at                             | CD2         | CD2 molecule                                                                                                | Hs.523500  | 2.26   | 3.6         | Immune system process                | T cells                               |                                                                                                     |
| 27      | 206150_at                             | CD27        | CD27 molecule                                                                                               | Hs.355307  | 2.24   | 3.6         | Immune system process                | T cells                               |                                                                                                     |
| 28      | 203868_s_at                           | VCAM1       | vascular cell adhesion molecule 1                                                                           | Hs.109225  | 2.21   | 4.2         |                                      |                                       |                                                                                                     |
| 29      | 204118_at, 237759_at                  | CD48        | CD48 molecule                                                                                               | Hs.243564  | 2.18   | 4.2         | Response to stimulus                 | lymphocytes                           | B cell membrane protein, ligand for CD2                                                             |
| 30      | 214032_at, 1555613_a_at               | ZAP70       | zeta-chain (TCR) associated protein kinase 70kDa                                                            | Hs.234569  | 2.18   | 4.2         | Immune system process                | T cells                               |                                                                                                     |
| 31      | 217549_at                             | ---         | ---                                                                                                         | Hs.527860  | 2.18   | 2.8         |                                      |                                       |                                                                                                     |
| 32      | 1559754_at, 207339_s_at               | LTB         | Lymphotoxin beta (TNF superfamily, member 3)                                                                | Hs.376208  | 2.16   | 3.6         | Immune system process                | leukocytes                            |                                                                                                     |
| 33      | 240068_at                             | C21orf130   | chromosome 21 open reading frame 130                                                                        | Hs.106234  | -2.15  | 2.5         |                                      |                                       |                                                                                                     |
| 34      | 1555779_a_at, 205049_s_at             | CD79A       | CD79a molecule, immunoglobulin-associated alpha                                                             | Hs.631567  | 2.13   | 3.6         | Immune system process                | B cells                               |                                                                                                     |
| 35      | 204057_at                             | IRF8        | interferon regulatory factor 8                                                                              | Hs.137427  | 2.12   | 4.2         | Immune system process                | leukocytes                            |                                                                                                     |
| 36      | 205922_at                             | VNN2        | vanin 2                                                                                                     | Hs.293130  | 2.11   | 5.3         |                                      |                                       |                                                                                                     |
| 37      | 231563_at                             | ---         | ---                                                                                                         | Hs.488388  | -2.11  | 4.2         |                                      |                                       |                                                                                                     |
| 38      | 205159_at                             | CSF2RB      | colony stimulating factor 2 receptor, beta, low-affinity (granulocyte-macrophage)                           | Hs.592192  | 2.10   | 4.2         | Receptor complex                     |                                       | GM-CSF/IL-3/IL-5 receptor common beta-chain                                                         |
| 39      | 205085_at                             | ORC1L       | origin recognition complex, subunit 1-like (yeast)                                                          | Hs.17908   | -2.08  | 2.5         |                                      |                                       |                                                                                                     |
| 40      | 239340_at, 242715_at                  | ---         | ---                                                                                                         | Hs.444181  | -2.07  | 5.3         |                                      |                                       |                                                                                                     |
| 41      | 202748_at                             | GBP2        | guanylate binding protein 2, interferon-inducible                                                           | Hs.386567  | 2.06   | 4.2         | Immune system process                | multiple                              |                                                                                                     |
| 42      | 215079_at                             | ---         | ---                                                                                                         | Hs.612917  | -2.05  | 1.9         |                                      |                                       |                                                                                                     |
| 43      | 206651_s_at                           | CPB2        | carboxypeptidase B2 (plasma)                                                                                | Hs.512937  | -2.05  | 1.7         |                                      |                                       |                                                                                                     |
| 44      | 202531_at                             | IRF1        | interferon regulatory factor 1                                                                              | Hs.436061  | 2.03   | 4.2         | Immune system process                | not clear                             |                                                                                                     |
| 45      | 1559065_a_at                          | CLEC4G      | C-type lectin superfamily 4, member G                                                                       | Hs.220649  | 2.02   | 4.2         |                                      |                                       |                                                                                                     |
| 46      | 1555292_at, 231880_at                 | FAM40B      | family with sequence similarity 40, member B                                                                | Hs.489988  | -2.02  | 2.5         |                                      |                                       |                                                                                                     |
| 47      | 210642_at                             | CCIN        | calicin                                                                                                     | Hs.115460  | -2.01  | 4.8         |                                      |                                       |                                                                                                     |
| 48      | 236295_s_at                           | NLR3        | NLR family, CARD domain containing 3                                                                        | Hs.592091  | 2.00   | 2.8         | Immune system process                | T cells                               | NOD3                                                                                                |
| 49      | 222346_at, 227048_at                  | LAMA1       | laminin, alpha 1                                                                                            | Hs.270364  | -1.99  | 0.7         |                                      |                                       |                                                                                                     |
| 50      | 206375_s_at                           | HSPB3       | heat shock 27kDa protein 3                                                                                  | Hs.41707   | 1.98   | 4.2         | Response to stimulus                 | not clear                             |                                                                                                     |
| 51      | 206666_at                             | GZMK        | granzyme K (granzyme 3; tryptase II)                                                                        | Hs.277937  | 1.98   | 4.8         |                                      |                                       |                                                                                                     |
| 52      | 206134_at                             | ADAMDEC1    | ADAM-like, decysin 1                                                                                        | Hs.521459  | 1.97   | 4.8         | Cell communication                   | dendritic cells (DC), macrophages     |                                                                                                     |
| 53      | 1553856_s_at, 214615_at               | P2RY10      | purinergic receptor P2Y, G-protein coupled, 10                                                              | Hs.296433  | 1.96   | 3.6         | Cell communication                   | leukocytes                            |                                                                                                     |
| 54      | 234675_x_at                           | ---         | ---                                                                                                         | Hs.532596  | 1.96   | 4.2         |                                      |                                       |                                                                                                     |
| 55      | 208514_at, 236407_at                  | KCNE1       | potassium voltage-gated channel, Isk-related family, member 1                                               | Hs.121495  | -1.95  | 1.2         |                                      |                                       |                                                                                                     |
| 56      | 1557103_a_at                          | LMTK3       | lemur tyrosine kinase 3                                                                                     | Hs.207426  | 1.94   | 4.2         |                                      |                                       |                                                                                                     |
| 57      | 243175_at                             | UTS2D       | urotensin 2 domain containing                                                                               | Hs.518492  | -1.93  | 0.0         |                                      |                                       |                                                                                                     |
| 58      | 205440_s_at                           | NPY1R       | neuropeptide Y receptor Y1                                                                                  | Hs.519057  | 1.93   | 3.6         | Response to stimulus                 | central and peripheral nervous system | a neurotransmitter receptor.                                                                        |
| 59      | 235334_at                             | ST6GALNAC3  | ST6 (alpha-N-acetylneuraminy-2,3-beta-galactosyl-1,3)-N-acetylgalactosaminide alpha-2,6-sialyltransferase 3 | Hs.337040  | -1.92  | 1.2         |                                      |                                       |                                                                                                     |
| 60      | 210279_at                             | GPR18       | G protein-coupled receptor 18                                                                               | Hs.631765  | 1.91   | 4.2         |                                      |                                       |                                                                                                     |
| 61      | 217147_s_at                           | TRAT1       | T cell receptor associated transmembrane adaptor 1                                                          | Hs.138701  | 1.91   | 4.8         | Immune system process                | T cells                               |                                                                                                     |
| 62      | 202523_s_at, 202524_s_at              | SPOCK2      | sparc/osteonectin, cwcv and kazal-like domains proteoglycan (testican) 2                                    | Hs.523009  | 1.90   | 2.5         |                                      |                                       |                                                                                                     |

| Probe # | AFFY ID(s)   | Gene Symbol   | Gene Title                                                                                            | UniGene ID | FC    | q-value (%) | Top Functional Gene Category (DAVID) | Cells expressing   | Notes and aliases                                              |
|---------|--------------|---------------|-------------------------------------------------------------------------------------------------------|------------|-------|-------------|--------------------------------------|--------------------|----------------------------------------------------------------|
| 65      | 205081_at    | CRIP1         | cysteine-rich protein 1 (intestinal)                                                                  | Hs.70327   | 1.88  | 3.6         |                                      |                    |                                                                |
| 66      | 207145_at    | MSTN          | myostatin                                                                                             | Hs.41565   | -1.87 | 4.2         |                                      |                    |                                                                |
| 67      | 218807_at    | VAV3          | vav 3 guanine nucleotide exchange factor                                                              | Hs.267659  | -1.87 | 4.2         |                                      |                    |                                                                |
| 68      | 217640_x_at  | C18orf24      | chromosome 18 open reading frame 24                                                                   | Hs.134726  | -1.86 | 0.7         | M Phase                              |                    |                                                                |
| 69      | 204923_at    | SASH3         | SAM and SH3 domain containing 3                                                                       | Hs.61469   | 1.86  | 4.2         |                                      |                    |                                                                |
| 70      | 223836_at    | FGFBP2        | fibroblast growth factor binding protein 2                                                            | Hs.98785   | -1.85 | 4.2         |                                      |                    |                                                                |
| 71      | 230245_s_at  | LOC283663     | hypothetical protein LOC283663                                                                        | Hs.181297  | 1.85  | 4.8         |                                      |                    |                                                                |
| 72      | 208590_x_at  | GJA3          | gap junction protein, alpha 3, 46kDa                                                                  | Hs.130313  | -1.85 | 1.9         |                                      |                    |                                                                |
| 73      | 220892_s_at  | PSAT1         | phosphoserine aminotransferase 1                                                                      | Hs.494261  | -1.84 | 1.6         | Cofactor Binding                     |                    |                                                                |
| 74      | 1559462_at   | ---           | ---                                                                                                   | Hs.446446  | -1.83 | 1.7         |                                      |                    |                                                                |
| 75      | 229686_at    | P2RY8         | purinergic receptor P2Y, G-protein coupled, 8                                                         | Hs.111377  | 1.83  | 3.6         | Cell communication                   | leukocytes         |                                                                |
| 76      | 237357_at    | ---           | ---                                                                                                   | Hs.221513  | 1.83  | 4.2         |                                      |                    |                                                                |
| 77      | 1561704_at   | ---           | ---                                                                                                   | Hs.639381  | 1.83  | 4.2         |                                      |                    |                                                                |
| 78      | 1555349_s_at | ITGB2         | integrin, beta 2 (complement component 3 receptor 3 and 4 subunit)                                    | Hs.375957  | 1.83  | 4.2         | Immune system process                | leukocytes         | CD18                                                           |
| 79      | 1554240_a_at | ITGAL         | integrin, alpha L (antigen CD11A (p180), lymphocyte function-associated antigen 1; alpha polypeptide) | Hs.174103  | 1.81  | 4.2         | Immune system process                | leukocytes         | CD11a                                                          |
| 80      | 238219_at    | C12orf50      | chromosome 12 open reading frame 50                                                                   | Hs.112930  | -1.80 | 2.1         |                                      |                    |                                                                |
| 81      | 240901_at    | ---           | ---                                                                                                   | Hs.547840  | 1.80  | 3.6         |                                      |                    |                                                                |
| 82      | 1562537_at   | FCER1A        | Fc fragment of IgE, high affinity I, receptor for; alpha polypeptide                                  | Hs.897     | 1.80  | 4.8         | Immune system process                | leukocytes         | Fc receptor for IgE                                            |
| 83      | 226474_at    | NLRC5         | NLR family, CARD domain containing 5                                                                  | Hs.528836  | 1.80  | 4.2         | Response to stimulus                 | not clear          |                                                                |
| 84      | 1554984_a_at | HLA-DOB       | major histocompatibility complex, class II, DO beta                                                   | Hs.1802    | 1.79  | 5.3         | Immune system process                | leukocytes         |                                                                |
| 85      | 1558522_at   | ---           | ---                                                                                                   | Hs.594275  | -1.78 | 1.7         |                                      |                    |                                                                |
| 86      | 241476_at    | ---           | ---                                                                                                   | Hs.299538  | 1.78  | 3.6         |                                      |                    |                                                                |
| 87      | 1562475_at   | DKFZp686O1327 | hypothetical gene supported by BC043549; BX648102                                                     | Hs.42192   | -1.78 | 1.6         |                                      |                    |                                                                |
| 88      | 216877_at    | ---           | ---                                                                                                   | ---        | ---   | ---         |                                      |                    |                                                                |
| 89      | 209708_at    | MOXD1         | monooxygenase, DBH-like 1                                                                             | Hs.6909    | -1.77 | 0.8         |                                      |                    |                                                                |
| 90      | 243697_at    | ---           | ---                                                                                                   | Hs.636837  | 1.77  | 2.5         |                                      |                    |                                                                |
| 91      | 233767_at    | ---           | ---                                                                                                   | Hs.636837  | 1.77  | 2.5         |                                      |                    |                                                                |
| 92      | 201502_s_at  | NFKBIA        | nuclear factor of kappa light polypeptide gene enhancer in B-cells inhibitor, alpha                   | Hs.81328   | 1.77  | 4.2         | Immune system process                | leukocytes         |                                                                |
| 93      | 244125_at    | ---           | ---                                                                                                   | Hs.601938  | 1.76  | 4.2         |                                      |                    |                                                                |
| 94      | 243154_at    | ---           | ---                                                                                                   | Hs.86650   | 1.76  | 2.5         |                                      |                    |                                                                |
| 95      | 223805_at    | OSBPL6        | oxysterol binding protein-like 6                                                                      | Hs.318775  | -1.75 | 0.8         |                                      |                    |                                                                |
| 96      | 236261_at    | ---           | ---                                                                                                   | Hs.460033  | -1.75 | 4.8         |                                      |                    |                                                                |
| 97      | 238575_at    | ---           | ---                                                                                                   | Hs.460033  | -1.75 | 4.8         |                                      |                    |                                                                |
| 98      | 1570469_at   | TAP1          | transporter 1, ATP-binding cassette, sub-family B (MDR/TAP)                                           | Hs.352018  | 1.75  | 4.2         | Immune system process                | multiple           |                                                                |
| 99      | 202307_s_at  | ---           | ---                                                                                                   | ---        | ---   | ---         |                                      |                    |                                                                |
| 100     | 1560100_at   | DLX1          | distal-less homeobox 1                                                                                | Hs.407015  | -1.74 | 2.5         |                                      |                    |                                                                |
| 101     | 242138_at    | MAP7D2        | MAP7 domain containing 2                                                                              | Hs.127951  | -1.74 | 0.7         |                                      |                    |                                                                |
| 102     | 228262_at    | DNASE1L3      | deoxyribonuclease I-like 3                                                                            | Hs.476453  | 1.74  | 4.8         | Cell communication                   | liver and spleen   |                                                                |
| 103     | 1561336_at   | ---           | ---                                                                                                   | Hs.255813  | 1.74  | 4.2         |                                      |                    |                                                                |
| 104     | 205554_s_at  | ---           | ---                                                                                                   | ---        | ---   | ---         |                                      |                    |                                                                |
| 105     | 1561021_at   | TNFRSF10B     | tumor necrosis factor receptor superfamily, member 10b                                                | Hs.521456  | -1.73 | 2.1         |                                      |                    |                                                                |
| 106     | 209294_x_at  | ---           | ---                                                                                                   | ---        | ---   | ---         |                                      |                    |                                                                |
| 107     | 209295_at    | METTL7B       | methyltransferase like 7B                                                                             | Hs.51483   | -1.73 | 2.8         |                                      |                    |                                                                |
| 108     | 210405_x_at  | RASSF5        | Ras association (RalGDS/AF-6) domain family member 5                                                  | Hs.497579  | 1.73  | 4.2         | Response to stimulus                 | leukocytes, tumors |                                                                |
| 109     | 227055_at    | IGLL1         | immunoglobulin lambda-like polypeptide 1                                                              | Hs.348935  | 1.72  | 2.5         | Immune system process                | B cells            |                                                                |
| 110     | 1554834_a_at | ---           | ---                                                                                                   | Hs.621242  | 1.72  | 2.5         |                                      |                    |                                                                |
| 111     | 223322_at    | ARHGAP30      | Rho GTPase activating protein 30                                                                      | Hs.389374  | 1.72  | 4.8         | Cell communication                   |                    |                                                                |
| 112     | 206660_at    | ---           | ---                                                                                                   | Hs.518877  | 1.71  | 2.5         |                                      |                    |                                                                |
| 113     | 1569510_at   | GPR85         | G protein-coupled receptor 85                                                                         | Hs.152009  | -1.71 | 0.8         |                                      |                    |                                                                |
| 114     | 226219_at    | ---           | ---                                                                                                   | ---        | ---   | ---         |                                      |                    |                                                                |
| 115     | 241346_at    | PTPN6         | protein tyrosine phosphatase, non-receptor type 6                                                     | Hs.63489   | 1.71  | 4.8         | Response to stimulus                 | hematopoietic      | PTP-1C, SHP-1, hematopoietic cell protein-tyrosine phosphatase |
| 116     | 1570268_at   | ---           | ---                                                                                                   | Hs.369782  | 1.71  | 4.2         |                                      |                    |                                                                |
| 117     | 219898_at    | CDH2          | cadherin 2, type 1, N-cadherin (neuronal)                                                             | Hs.464829  | -1.71 | 0.7         |                                      |                    |                                                                |
| 118     | 234303_s_at  | LG12          | leucine-rich repeat LG1 family, member 2                                                              | Hs.12488   | 1.70  | 3.6         |                                      |                    |                                                                |
| 119     | 239689_at    | ---           | ---                                                                                                   | Hs.385861  | -1.69 | 0.0         |                                      |                    |                                                                |
| 120     | 203440_at    | SIRPG         | signal-regulatory protein gamma                                                                       | Hs.590883  | 1.69  | 2.8         | Immune system process                | T cells            | CD172g                                                         |
| 121     | 203441_s_at  | ---           | ---                                                                                                   | Hs.634845  | 1.69  | 3.6         |                                      |                    |                                                                |
| 122     | 219699_at    | UGT8          | UDP glycosyltransferase 8 (UDP-galactose ceramide galactosyltransferase)                              | Hs.144197  | -1.69 | 4.2         |                                      |                    |                                                                |
| 123     | 241790_at    | CLECL1        | C-type lectin-like 1                                                                                  | Hs.560087  | 1.69  | 2.5         |                                      |                    |                                                                |
| 124     | 220485_s_at  | GVIN1         | GTPase, very large interferon inducible 1                                                             | Hs.494757  | 1.69  | 4.2         |                                      |                    |                                                                |
| 125     | 237753_at    | ---           | ---                                                                                                   | ---        | ---   | ---         |                                      |                    |                                                                |
| 126     | 208358_s_at  | ---           | ---                                                                                                   | ---        | ---   | ---         |                                      |                    |                                                                |
| 127     | 228956_at    | ---           | ---                                                                                                   | ---        | ---   | ---         |                                      |                    |                                                                |
| 128     | 1561899_at   | ---           | ---                                                                                                   | ---        | ---   | ---         |                                      |                    |                                                                |
| 129     | 244413_at    | ---           | ---                                                                                                   | ---        | ---   | ---         |                                      |                    |                                                                |
| 130     | 220577_at    | ---           | ---                                                                                                   | ---        | ---   | ---         |                                      |                    |                                                                |
| 131     | 1560689_s_at | ---           | ---                                                                                                   | ---        | ---   | ---         |                                      |                    |                                                                |
| 132     | 203809_s_at  | ---           | ---                                                                                                   | ---        | ---   | ---         |                                      |                    |                                                                |
| 133     | 211453_s_at  | ---           | ---                                                                                                   | ---        | ---   | ---         |                                      |                    |                                                                |
| 134     | 225471_s_at  | ---           | ---                                                                                                   | ---        | ---   | ---         |                                      |                    |                                                                |
| 135     | 226156_at    | ---           | ---                                                                                                   | ---        | ---   | ---         |                                      |                    |                                                                |
| 136     | 236664_at    | ---           | ---                                                                                                   | ---        | ---   | ---         |                                      |                    |                                                                |
| 137     | 238504_at    | C6orf57       | chromosome 6 open reading frame 57                                                                    | Hs.418495  | -1.68 | 2.8         |                                      |                    |                                                                |
| 138     | 208303_s_at  | CRLF2         | cytokine receptor-like factor 2                                                                       | Hs.287729  | 1.68  | 4.2         |                                      |                    |                                                                |
| 139     | 206310_at    | SPINK2        | serine peptidase inhibitor, Kazal type 2 (acrosin-trypsin inhibitor)                                  | Hs.98243   | 1.68  | 3.6         |                                      |                    |                                                                |
| 140     | 208394_x_at  | ESM1          | endothelial cell-specific molecule 1                                                                  | Hs.129944  | -1.67 | 3.6         |                                      |                    |                                                                |
| 141     | 230312_at    | ---           | ---                                                                                                   | Hs.88045   | -1.67 | 0.8         |                                      |                    |                                                                |
| 142     | 228094_at    | AMICA1        | adhesion molecule, interacts with CXADR antigen 1                                                     | Hs.16291   | 1.67  | 3.6         |                                      |                    |                                                                |
| 143     | 230874_at    | ---           | ---                                                                                                   | Hs.596383  | -1.67 | 2.8         |                                      |                    |                                                                |

| Probe # | AFFY ID(s)                                                                         | Gene Symbol           | Gene Title                                                                                       | UniGene ID | FC           | q-value (%) | Top Functional Gene Category (DAVID) | Cells expressing  | Notes and aliases        |
|---------|------------------------------------------------------------------------------------|-----------------------|--------------------------------------------------------------------------------------------------|------------|--------------|-------------|--------------------------------------|-------------------|--------------------------|
| 126     | 1554362_at,<br>220766_at                                                           | <b>BTG4</b>           | <b>B-cell translocation gene 4</b>                                                               | Hs.128180  | <b>1.67</b>  | 3.6         |                                      |                   |                          |
| 127     | 235572_at                                                                          | <b>SPC24</b>          | <b>SPC24, NDC80 kinetochore complex component, homolog (S. cerevisiae)</b>                       | Hs.381225  | <b>-1.66</b> | 1.6         | M Phase                              |                   |                          |
| 128     | 241190_at                                                                          | ---                   | ---                                                                                              | Hs.197082  | <b>1.66</b>  | 4.8         |                                      |                   |                          |
| 129     | 230921_s_at,<br>1554717_a_at,<br>204491_at,                                        | <b>MAP3K12</b>        | ---                                                                                              | Hs.593270  | <b>1.66</b>  | 4.2         | Cell communication                   | Keratinocytes     |                          |
| 130     | 210836_x_at,<br>210837_s_at,<br>211840_s_at,<br>228962_at                          | <b>PDE4D</b>          | <b>phosphodiesterase 4D, cAMP-specific (phosphodiesterase E3 dunce homolog, Drosophila)</b>      | Hs.117545  | <b>-1.66</b> | 2.8         |                                      |                   |                          |
| 131     | 214049_x_at,<br>214551_s_at                                                        | <b>CD7</b>            | <b>CD7 molecule</b>                                                                              | Hs.36972   | <b>1.65</b>  | 4.2         | Immune system process                | T cells           |                          |
| 132     | 1552386_at                                                                         | <b>C5orf29</b>        | <b>chromosome 5 open reading frame 29</b>                                                        | Hs.547697  | <b>1.65</b>  | 4.2         |                                      |                   |                          |
| 133     | 211353_at,<br>223625_at,<br>227239_at,<br>231396_s_at,<br>244115_at                | <b>LRIT1</b>          | <b>leucine-rich repeat, immunoglobulin-like and transmembrane domains 1</b>                      | Hs.226000  | <b>-1.65</b> | 3.6         |                                      |                   |                          |
| 134     | 223625_at,<br>227239_at,<br>231396_s_at,<br>244115_at                              | <b>FAM126A</b>        | <b>family with sequence similarity 126, member A</b>                                             | Hs.85603   | <b>-1.65</b> | 3.2         |                                      |                   |                          |
| 136     | 203331_s_at,<br>203332_s_at                                                        | <b>INPP5D</b>         | <b>inositol polyphosphate-5-phosphatase, 145kDa</b>                                              | Hs.262886  | <b>1.65</b>  | 4.8         | Immune system process                | leukocytes        | SHIP-1                   |
| 137     | 201137_s_at                                                                        | <b>HLA-DPB1</b>       | <b>major histocompatibility complex, class II, DP beta 1</b>                                     | Hs.485130  | <b>1.64</b>  | 5.3         | Immune system process                | leukocytes        |                          |
| 138     | 237802_at                                                                          | <b>XKR4</b>           | <b>XK, Kell blood group complex subunit-related family, member 4</b>                             | Hs.130197  | <b>1.64</b>  | 3.6         |                                      |                   |                          |
| 139     | 237425_at                                                                          | <b>LOC474358</b>      | <b>hypothetical BC042079 locus</b>                                                               | Hs.348526  | <b>1.64</b>  | 4.2         |                                      |                   |                          |
| 140     | 230339_at,<br>235644_at                                                            | <b>CCDC138</b>        | <b>Coiled-coil domain containing 138</b>                                                         | Hs.362702  | <b>-1.64</b> | 4.2         |                                      |                   |                          |
| 141     | 225415_at                                                                          | <b>DTX3L</b>          | <b>deltex 3-like (Drosophila)</b>                                                                | Hs.518201  | <b>1.64</b>  | 4.2         |                                      |                   |                          |
| 142     | 206631_at                                                                          | <b>PTGER2</b>         | <b>prostaglandin E receptor 2 (subtype EP2), 53kDa</b>                                           | Hs.2090    | <b>1.63</b>  | 3.6         | Cell communication                   | placenta and lung |                          |
| 143     | 1560676_at                                                                         | <b>LOC283514</b>      | <b>similar to seven in absentia 2</b>                                                            | Hs.368483  | <b>1.63</b>  | 3.6         |                                      |                   |                          |
| 144     | 239922_at,<br>207752_x_at,                                                         | <b>CCDC142</b>        | <b>coiled-coil domain containing 142</b>                                                         | Hs.430199  | <b>-1.63</b> | 2.1         |                                      |                   |                          |
| 145     | 211531_x_at,<br>210597_x_at                                                        | <b>PRB1</b>           | <b>proline-rich protein BstNI subfamily 1</b>                                                    | Hs.631726  | <b>1.63</b>  | 3.6         |                                      |                   |                          |
| 146     | 239579_at                                                                          | <b>ABHD7</b>          | <b>abhydrolase domain containing 7</b>                                                           | Hs.201555  | <b>-1.63</b> | 2.5         |                                      |                   |                          |
| 147     | 205790_at                                                                          | <b>SKAP1</b>          | <b>src kinase associated phosphoprotein 1</b>                                                    | Hs.316931  | <b>1.62</b>  | 4.2         | Immune system process                | T cells           |                          |
| 148     | 216030_s_at                                                                        | <b>SEMG2</b>          | <b>semenogelin II</b>                                                                            | Hs.537218  | <b>1.62</b>  | 4.2         |                                      |                   |                          |
| 149     | 206256_at                                                                          | <b>CPN1</b>           | <b>carboxypeptidase N, polypeptide 1</b>                                                         | Hs.2246    | <b>-1.62</b> | 1.7         |                                      |                   |                          |
| 150     | 243942_at                                                                          | ---                   | ---                                                                                              | Hs.575572  | <b>1.62</b>  | 4.2         |                                      |                   |                          |
| 151     | 209040_s_at                                                                        | <b>PSMB8</b>          | <b>proteasome (prosome, macropain) subunit, beta type, 8 (large multifunctional peptidase 7)</b> | Hs.180062  | <b>1.62</b>  | 4.2         | Immune system process                | leukocytes        | immunoproteasome subunit |
| 152     | 238452_at                                                                          | <b>FCRLB</b>          | <b>Fc receptor-like B</b>                                                                        | Hs.517422  | <b>-1.62</b> | 0.7         |                                      |                   |                          |
| 153     | 233829_at,<br>212141_at,<br>212142_at,<br>222036_s_at,<br>222037_at,<br>208694_at, | <b>C20orf118</b>      | <b>chromosome 20 open reading frame 118</b>                                                      | Hs.472630  | <b>1.62</b>  | 4.2         |                                      |                   |                          |
| 154     | 212142_at,<br>222036_s_at,<br>222037_at,<br>208694_at,                             | <b>MCM4</b>           | <b>minichromosome maintenance complex component 4</b>                                            | Hs.460184  | <b>-1.61</b> | 0.7         |                                      |                   |                          |
| 155     | 210543_s_at,<br>215757_at,<br>218039_at,                                           | <b>PRKDC</b>          | <b>protein kinase, DNA-activated, catalytic polypeptide</b>                                      | Hs.491682  | <b>-1.61</b> | 2.5         |                                      |                   |                          |
| 156     | 219978_s_at,<br>205598_at                                                          | <b>NUSAP1</b>         | <b>nucleolar and spindle associated protein 1</b>                                                | Hs.615092  | <b>-1.61</b> | 0.0         | M Phase                              |                   |                          |
| 157     | 210432_s_at,<br>232512_at                                                          | <b>TRAI</b>           | <b>TRAF interacting protein</b>                                                                  | Hs.517972  | <b>-1.61</b> | 2.1         |                                      |                   |                          |
| 158     | 232512_at                                                                          | <b>SCN3A</b>          | <b>sodium channel, voltage-gated, type III, alpha subunit</b>                                    | Hs.435274  | <b>1.61</b>  | 4.8         |                                      |                   |                          |
| 159     | 236226_at                                                                          | <b>BTLA</b>           | <b>B and T lymphocyte associated</b>                                                             | Hs.445162  | <b>1.61</b>  | 4.2         | Immune system process                | leukocytes        | CD272                    |
| 160     | 227051_at                                                                          | ---                   | ---                                                                                              | Hs.43047   | <b>-1.60</b> | 2.8         |                                      |                   |                          |
| 161     | 201531_at                                                                          | <b>ZFP36</b>          | <b>zinc finger protein 36, C3H type, homolog (mouse)</b>                                         | Hs.534052  | <b>1.60</b>  | 4.2         | Immune system process                | not clear         | Functions in TNFa effect |
| 162     | 219148_at                                                                          | <b>PBK</b>            | <b>PDZ binding kinase</b>                                                                        | Hs.104741  | <b>-1.60</b> | 0.0         | M Phase                              |                   |                          |
| 163     | 1554403_a_at                                                                       | ---                   | ---                                                                                              | Hs.553957  | <b>-1.60</b> | 1.2         |                                      |                   |                          |
| 164     | 207329_at,<br>203393_at,                                                           | <b>MMP8</b>           | <b>matrix metalloproteinase 8 (neutrophil collagenase)</b>                                       | Hs.161839  | <b>-1.60</b> | 1.6         |                                      |                   |                          |
| 165     | 203394_s_at,<br>203395_s_at                                                        | <b>HES1</b>           | <b>hairy and enhancer of split 1, (Drosophila)</b>                                               | Hs.250666  | <b>-1.60</b> | 2.1         |                                      |                   |                          |
| 166     | 209813_x_at,<br>211144_x_at,                                                       | <b>TARP</b>           | <b>TCR gamma alternate reading frame protein</b>                                                 | Hs.534032  | <b>1.59</b>  | 4.2         |                                      |                   |                          |
| 167     | 217374_x_at,<br>216920_s_at,<br>227554_at,                                         | <b>TRGC2 /// TARP</b> | <b>T cell receptor gamma constant 2 /// TCR gamma alternate reading frame protein</b>            | Hs.534032  | <b>1.59</b>  | 4.2         |                                      |                   |                          |
| 168     | 229480_at,<br>235267_at                                                            | ---                   | ---                                                                                              | Hs.31474   | <b>-1.59</b> | 4.8         |                                      |                   |                          |
| 169     | 210439_at,<br>1554908_at,<br>1554907_a_at,                                         | <b>ICOS</b>           | <b>inducible T-cell co-stimulator</b>                                                            | Hs.56247   | <b>1.59</b>  | 3.6         | Immune system process                | T cells           | ICOS                     |
| 170     | 243354_at,<br>232984_at,<br>220098_at,<br>204252_at,                               | <b>HYDIN</b>          | <b>hydrocephalus inducing homolog (mouse)</b>                                                    | Hs.461229  | <b>1.59</b>  | 4.8         |                                      |                   |                          |
| 171     | 211803_at,<br>211804_s_at,<br>203470_s_at,<br>203471_s_at                          | <b>CDK2</b>           | <b>cyclin-dependent kinase 2</b>                                                                 | Hs.19192   | <b>-1.59</b> | 3.2         | M Phase                              |                   |                          |
| 172     | 205519_at                                                                          | <b>PLEK</b>           | <b>pleckstrin</b>                                                                                | Hs.468840  | <b>1.59</b>  | 4.2         | Cell communication                   | not clear         | substrate of platelets   |
| 173     | 205543_at                                                                          | <b>WDR76</b>          | <b>WD repeat domain 76</b>                                                                       | Hs.250154  | <b>-1.59</b> | 3.2         |                                      |                   |                          |
| 174     | 205543_at                                                                          | <b>HSPA4L</b>         | <b>heat shock 70kDa protein 4-like</b>                                                           | Hs.135554  | <b>-1.59</b> | 2.1         |                                      |                   |                          |
| 175     | 206323_x_at                                                                        | <b>OPHN1</b>          | <b>oligophrenin 1</b>                                                                            | Hs.128824  | <b>1.59</b>  | 4.2         |                                      |                   |                          |
| 176     | 207444_at,<br>204018_x_at,<br>217414_x_at,<br>214414_x_at,                         | <b>SLC22A13</b>       | <b>solute carrier family 22, member 13</b>                                                       | Hs.225941  | <b>-1.59</b> | 4.2         |                                      |                   |                          |
| 177     | 211745_x_at,<br>211699_x_at,<br>209458_x_at                                        | <b>HBA1 /// HBA2</b>  | <b>hemoglobin, alpha 1 /// hemoglobin, alpha 2</b>                                               | Hs.449630  | <b>1.59</b>  | 4.8         |                                      |                   |                          |

| Probe # | AFFY ID(s)                                                                                         | Gene Symbol | Gene Title                                                                                                          | UniGene ID | FC    | q-value (%) | Top Functional Gene Category (DAVID) | Cells expressing                      | Notes and aliases               |
|---------|----------------------------------------------------------------------------------------------------|-------------|---------------------------------------------------------------------------------------------------------------------|------------|-------|-------------|--------------------------------------|---------------------------------------|---------------------------------|
| 178     | 204265_s_at, 214847_s_at                                                                           | GPSM3       | G-protein signaling modulator 3 (AGS3-like, C. elegans)                                                             | Hs.520046  | 1.59  | 2.8         | Immune system process                | not clear                             |                                 |
| 179     | 233669_s_at, 201008_s_at                                                                           | TRIM54      | tripartite motif-containing 54                                                                                      | Hs.516036  | 1.59  | 4.2         | Cell communication                   |                                       |                                 |
| 180     | 201009_s_at, 201010_s_at, 208206_s_at, 214369_s_at, 214368_at, 214367_at                           | TXNIP       | thioredoxin interacting protein                                                                                     | Hs.533977  | 1.59  | 4.8         | Response to stimulus                 | multiple                              | required for NK cell maturation |
| 181     | 202223_at                                                                                          | RASGRP2     | RAS guanyl releasing protein 2 (calcium and DAG-regulated)                                                          | Hs.99491   | 1.58  | 4.2         | Response to stimulus                 | multiple                              |                                 |
| 182     | 202223_at                                                                                          | STT3A       | STT3, subunit of the oligosaccharyltransferase complex, homolog A (S. cerevisiae)                                   | Hs.504237  | -1.58 | 1.2         |                                      |                                       |                                 |
| 183     | 1561737_at                                                                                         | ---         | ---                                                                                                                 | Hs.573815  | 1.58  | 2.5         |                                      |                                       |                                 |
| 184     | 205901_at                                                                                          | PNOC        | prepronociceptin                                                                                                    | Hs.88218   | 1.58  | 5.3         | Cell communication                   | central and peripheral nervous system |                                 |
| 185     | 238815_at                                                                                          | LRRTM1      | leucine rich repeat transmembrane neuronal 1                                                                        | Hs.591580  | -1.58 | 5.3         |                                      |                                       |                                 |
| 186     | 209733_at, 218782_s_at                                                                             | LOC286440   | hypothetical protein LOC286440                                                                                      | Hs.348844  | 1.58  | 3.6         |                                      |                                       |                                 |
| 187     | 222740_at, 228401_at, 235266_at                                                                    | ATAD2       | ATPase family, AAA domain containing 2                                                                              | Hs.370834  | -1.57 | 0.0         |                                      |                                       |                                 |
| 188     | 239509_at                                                                                          | ---         | ---                                                                                                                 | Hs.111539  | -1.57 | 3.2         |                                      |                                       |                                 |
| 189     | 1564463_at                                                                                         | LOC283711   | hypothetical protein LOC283711                                                                                      | Hs.585100  | 1.57  | 4.2         |                                      |                                       |                                 |
| 190     | 219249_s_at                                                                                        | FKBP10      | FK506 binding protein 10, 65 kDa                                                                                    | Hs.463035  | -1.57 | 3.6         |                                      |                                       |                                 |
| 191     | 229490_s_at, 1563137_at, 238445_x_at                                                               | ---         | ---                                                                                                                 | Hs.133294  | -1.57 | 0.7         |                                      |                                       |                                 |
| 192     | 238445_x_at                                                                                        | MGAT5B      | mannosyl (alpha-1,6-)-glycoprotein beta-1,6-N-acetylglucosaminyltransferase, isozyme B                              | Hs.144531  | -1.56 | 0.7         |                                      |                                       |                                 |
| 193     | 210313_at                                                                                          | LILRA4      | leukocyte immunoglobulin-like receptor, subfamily A (with TM domain), member 4                                      | Hs.406708  | 1.56  | 3.6         | Immune system process                | Plasmacytoid DCs                      | CD85g                           |
| 194     | 218614_at, 227152_at                                                                               | C12orf35    | chromosome 12 open reading frame 35                                                                                 | Hs.445129  | 1.56  | 4.2         |                                      |                                       |                                 |
| 195     | 230423_at                                                                                          | ---         | ---                                                                                                                 | Hs.120204  | -1.56 | 2.5         |                                      |                                       |                                 |
| 196     | 1566215_at, 1566217_at                                                                             | ---         | ---                                                                                                                 | Hs.606954  | 1.56  | 4.2         |                                      |                                       |                                 |
| 197     | 209309_at, 217014_s_at                                                                             | AZGP1       | alpha-2-glycoprotein 1, zinc-binding                                                                                | Hs.546239  | -1.56 | 4.2         |                                      |                                       |                                 |
| 198     | 1557155_a_at, 241440_at, 205048_s_at                                                               | ---         | ---                                                                                                                 | Hs.535724  | -1.56 | 0.8         |                                      |                                       |                                 |
| 199     | 205194_at, 244819_x_at                                                                             | PSPH        | phosphoserine phosphatase                                                                                           | Hs.512656  | -1.56 | 2.1         |                                      |                                       |                                 |
| 200     | 240315_at                                                                                          | ---         | ---                                                                                                                 | Hs.363386  | 1.56  | 3.6         |                                      |                                       |                                 |
| 201     | 210712_at                                                                                          | LDHAL6B     | lactate dehydrogenase A-like 6B                                                                                     | Hs.307052  | 1.56  | 4.2         |                                      |                                       |                                 |
| 202     | 241483_at                                                                                          | ---         | ---                                                                                                                 | Hs.62772   | 1.55  | 2.5         |                                      |                                       |                                 |
| 203     | 1562997_a_at                                                                                       | ---         | ---                                                                                                                 | Hs.436357  | -1.55 | 2.8         |                                      |                                       |                                 |
| 205     | 224920_x_at, 225673_at, 1565818_s_at, 231929_at, 220567_at, 1555060_a_at, 216901_s_at, 205039_s_at | MYADM       | myeloid-associated differentiation marker                                                                           | Hs.380906  | 1.55  | 4.8         |                                      |                                       |                                 |
| 206     | 220567_at, 1555060_a_at, 216901_s_at, 205039_s_at                                                  | IKZF1       | IKAROS family zinc finger 1 (Ikaros)                                                                                | Hs.435949  | 1.55  | 4.2         |                                      |                                       |                                 |
| 207     | 206141_at                                                                                          | MOCS3       | molybdenum cofactor synthesis 3                                                                                     | Hs.159410  | -1.55 | 2.1         |                                      |                                       |                                 |
| 208     | 204603_at                                                                                          | EXO1        | exonuclease 1                                                                                                       | Hs.498248  | -1.54 | 0.7         | M Phase                              |                                       |                                 |
| 209     | 221134_at                                                                                          | ANGPT4      | angiopoietin 4                                                                                                      | Hs.278973  | 1.54  | 4.2         | Cell communication                   | lungs                                 |                                 |
| 210     | 223820_at                                                                                          | RBP5        | retinol binding protein 5, cellular                                                                                 | Hs.246046  | 1.54  | 4.2         |                                      |                                       |                                 |
| 211     | 220418_at                                                                                          | UBASH3A     | ubiquitin associated and SH3 domain containing, A                                                                   | Hs.473912  | 1.54  | 3.6         | Immune system process                | T cells                               | Suppressor of T-cell signalling |
| 212     | 227552_at                                                                                          | SEP1        | septin 1                                                                                                            | Hs.632176  | 1.54  | 3.6         |                                      |                                       |                                 |
| 213     | 244479_at                                                                                          | ---         | ---                                                                                                                 | Hs.126664  | -1.54 | 1.2         |                                      |                                       |                                 |
| 214     | 219926_at                                                                                          | POPDC3      | popeye domain containing 3                                                                                          | Hs.458336  | -1.54 | 0.7         |                                      |                                       |                                 |
| 215     | 204470_at                                                                                          | CXCL1       | chemokine (C-X-C motif) ligand 1 (melanoma growth stimulating activity, alpha)                                      | Hs.789     | -1.54 | 5.3         |                                      |                                       |                                 |
| 216     | 1561625_at, 204727_at                                                                              | ---         | ---                                                                                                                 | Hs.563806  | 1.54  | 4.8         |                                      |                                       |                                 |
| 217     | 204728_s_at, 216228_s_at, 205195_at                                                                | WDHD1       | WD repeat and HMG-box DNA binding protein 1                                                                         | Hs.385998  | -1.54 | 1.2         |                                      |                                       |                                 |
| 218     | 205196_s_at, 209635_at, 208050_s_at, 209811_at                                                     | AP1S1       | adaptor-related protein complex 1, sigma 1 subunit                                                                  | Hs.563509  | -1.54 | 3.2         |                                      |                                       |                                 |
| 219     | 209812_x_at, 211140_s_at, 226032_at, 226036_x_at, 34449_at                                         | CASP2       | caspase 2, apoptosis-related cysteine peptidase (neural precursor cell expressed, developmentally down-regulated 2) | Hs.368982  | -1.54 | 2.8         |                                      |                                       |                                 |
| 220     | 221008_s_at                                                                                        | AGXT2L1     | alanine-glyoxylate aminotransferase 2-like 1                                                                        | Hs.106576  | -1.54 | 1.7         | Cofactor Binding                     |                                       |                                 |
| 221     | 1564139_at                                                                                         | LOC144571   | hypothetical protein LOC144571                                                                                      | Hs.592432  | 1.53  | 4.2         |                                      |                                       |                                 |
| 222     | 213172_at, 213174_at                                                                               | TTC9        | tetratricopeptide repeat domain 9                                                                                   | Hs.79170   | 1.53  | 4.2         |                                      |                                       |                                 |
| 223     | 223593_at                                                                                          | AADAT       | aminoadipate aminotransferase                                                                                       | Hs.529735  | -1.53 | 4.2         | Cofactor Binding                     |                                       |                                 |
| 224     | 1552818_a_at, 207369_at                                                                            | BRS3        | bombesin-like receptor 3                                                                                            | Hs.121484  | -1.53 | 3.2         |                                      |                                       |                                 |
| 225     | 212092_at, 212094_at, 218994_s_at                                                                  | PEG10       | paternally expressed 10                                                                                             | Hs.147492  | -1.53 | 4.8         |                                      |                                       |                                 |
| 226     | 222801_s_at, 231521_at                                                                             | STAG3L4     | stromal antigen 3-like 4                                                                                            | Hs.632013  | -1.53 | 4.2         |                                      |                                       |                                 |
| 227     | 1557370_s_at, 201960_s_at, 201959_s_at, 1561082_at                                                 | MYCBP2      | MYC binding protein 2                                                                                               | Hs.591221  | 1.53  | 2.8         |                                      |                                       |                                 |
| 228     | 202007_at, 202008_s_at                                                                             | NID1        | nidogen 1                                                                                                           | Hs.356624  | -1.53 | 0.8         |                                      |                                       |                                 |

| Probe # | AFFY ID(s)                                                                                            | Gene Symbol | Gene Title                                                                                       | UniGene ID | FC    | q-value (%) | Top Functional Gene Category (DAVID) | Cells expressing | Notes and aliases                        |
|---------|-------------------------------------------------------------------------------------------------------|-------------|--------------------------------------------------------------------------------------------------|------------|-------|-------------|--------------------------------------|------------------|------------------------------------------|
| 229     | 225203_at                                                                                             | PPP1R16A    | protein phosphatase 1, regulatory (inhibitor) subunit 16A                                        | Hs.521937  | -1.53 | 0.7         |                                      |                  |                                          |
| 230     | 217412_at                                                                                             | ---         | ---                                                                                              | Hs.494972  | 1.53  | 3.6         |                                      |                  |                                          |
| 231     | 1564074_at                                                                                            | ---         | ---                                                                                              | Hs.562365  | 1.53  | 4.2         |                                      |                  |                                          |
| 232     | 230956_at,<br>238701_x_at                                                                             | FLJ45803    | FLJ45803 protein                                                                                 | Hs.125166  | 1.52  | 4.2         |                                      |                  |                                          |
| 233     | 205937_at                                                                                             | CGREF1      | cell growth regulator with EF-hand domain 1                                                      | Hs.159525  | -1.52 | 3.6         | Cell Cycle Phase                     |                  |                                          |
| 234     | 202314_at,<br>216607_s_at                                                                             | CYP51A1     | cytochrome P450, family 51, subfamily A, polypeptide 1                                           | Hs.417077  | -1.52 | 0.7         |                                      |                  |                                          |
| 235     | 201870_at                                                                                             | TOMM34      | translocase of outer mitochondrial membrane 34                                                   | Hs.517066  | -1.52 | 0.7         |                                      |                  |                                          |
| 236     | 1552623_at                                                                                            | HSH2D       | hematopoietic SH2 domain containing                                                              | Hs.631617  | 1.52  | 2.5         | Immune system process                | T cells          | mediates signalling through TCR and CD28 |
| 237     | 230805_at                                                                                             | ---         | ---                                                                                              | Hs.355944  | 1.52  | 4.2         |                                      |                  |                                          |
| 238     | 230980_x_at,<br>231038_s_at,<br>200737_at,<br>227068_at,<br>217383_at,<br>217356_s_at,<br>200738_s_at | ---         | ---                                                                                              | Hs.355944  | 1.52  | 4.2         |                                      |                  |                                          |
| 239     | 217383_at,<br>217356_s_at,<br>200738_s_at                                                             | PGK1        | phosphoglycerate kinase 1                                                                        | Hs.78771   | -1.52 | 0.8         |                                      |                  |                                          |
| 240     | 238576_at                                                                                             | ---         | ---                                                                                              | Hs.592734  | -1.52 | 3.2         |                                      |                  |                                          |
| 241     | 1570300_at                                                                                            | ---         | ---                                                                                              | Hs.348434  | 1.52  | 4.8         |                                      |                  |                                          |
| 242     | 1552619_a_at,<br>222608_s_at                                                                          | ANLN        | anillin, actin binding protein                                                                   | Hs.62180   | -1.51 | 0.8         | M Phase                              |                  |                                          |
| 243     | 235736_at                                                                                             | ---         | ---                                                                                              | Hs.178144  | -1.51 | 0.7         |                                      |                  |                                          |
| 244     | 221117_at                                                                                             | ---         | ---                                                                                              | Hs.543586  | 1.51  | 4.2         |                                      |                  |                                          |
| 245     | 208277_at                                                                                             | PITX3       | paired-like homeodomain 3                                                                        | Hs.137568  | 1.51  | 3.6         |                                      |                  |                                          |
| 246     | 204033_at                                                                                             | TRIP13      | thyroid hormone receptor interactor 13                                                           | Hs.436187  | -1.51 | 0.7         |                                      |                  |                                          |
| 247     | 205959_at                                                                                             | MMP13       | matrix metalloproteinase 13 (collagenase 3)                                                      | Hs.2936    | -1.51 | 4.2         |                                      |                  |                                          |
| 248     | 203233_at,<br>242743_at                                                                               | IL4R        | interleukin 4 receptor                                                                           | Hs.513457  | 1.50  | 4.8         | Immune system process                | leukocytes       | CD124, IL4Ra                             |
| 249     | 240049_at                                                                                             | DLG5        | ---                                                                                              | Hs.626305  | 1.50  | 4.2         | Cell communication                   | Epithelial cells |                                          |
| 250     | 229147_at                                                                                             | RASSF6      | Ras association (RalGDS/AF-6) domain family 6, Ras association domain-containing protein 6,      | Hs.529677  | 1.50  | 4.2         | Cell communication                   | multiple         |                                          |
| 251     | 203408_s_at                                                                                           | SATB1       | SATB homeobox 1                                                                                  | Hs.517717  | 1.50  | 4.2         |                                      |                  |                                          |
| 252     | 210090_at                                                                                             | ARC         | activity-regulated cytoskeleton-associated protein                                               | Hs.40888   | -1.50 | 4.8         |                                      |                  |                                          |
| 253     | 219556_at                                                                                             | C16orf59    | chromosome 16 open reading frame 59                                                              | Hs.534491  | -1.50 | 0.0         |                                      |                  |                                          |
| 254     | 228298_at                                                                                             | FAM113B     | family with sequence similarity 113, member B                                                    | Hs.560100  | 1.50  | 3.6         |                                      |                  |                                          |
| 255     | 205676_at                                                                                             | CYP27B1     | cytochrome P450, family 27, subfamily B, polypeptide 1                                           | Hs.524528  | -1.50 | 4.2         |                                      |                  |                                          |
| 256     | 207256_at                                                                                             | MBL2        | mannose-binding lectin (protein C) 2, soluble (opsonic defect)                                   | Hs.499674  | 1.50  | 4.2         | Immune system process                | leukocytes       | MBP1                                     |
| 257     | 227929_at                                                                                             | ---         | ---                                                                                              | Hs.586760  | 1.49  | 3.6         |                                      |                  |                                          |
| 258     | 218984_at,<br>235428_at,                                                                              | PUS7        | pseudouridylyl synthase 7 homolog (S. cerevisiae)                                                | Hs.520619  | -1.49 | 2.5         |                                      |                  |                                          |
| 259     | 243749_s_at,<br>244411_at                                                                             | ---         | ---                                                                                              | Hs.446671  | -1.49 | 4.8         |                                      |                  |                                          |
| 260     | 230896_at,<br>238101_at                                                                               | CCDC4       | coiled-coil domain containing 4                                                                  | Hs.120591  | 1.49  | 3.6         |                                      |                  |                                          |
| 261     | 1554540_at,<br>242283_at                                                                              | DNAH14      | dynein, axonemal, heavy chain 14 /// chromosome 1 open reading frame 67 /// similar to CG7092-PA | Hs.133977  | -1.49 | 0.0         |                                      |                  |                                          |
| 262     | 227165_at                                                                                             | C13orf3     | chromosome 13 open reading frame 3                                                               | Hs.88523   | -1.49 | 1.4         |                                      |                  |                                          |
| 263     | 225798_at,<br>225800_at                                                                               | JAZF1       | JAZF zinc finger 1                                                                               | Hs.368944  | -1.49 | 4.8         |                                      |                  |                                          |
| 264     | 235949_at,<br>1552660_a_at,                                                                           | ---         | ---                                                                                              | Hs.133020  | -1.49 | 0.0         |                                      |                  |                                          |
| 265     | 1565939_at,<br>203738_at                                                                              | C5orf22     | chromosome 5 open reading frame 22                                                               | Hs.519246  | -1.48 | 4.8         |                                      |                  |                                          |
| 266     | 1561990_at                                                                                            | LOC157931   | hypothetical protein LOC157931                                                                   | Hs.97461   | 1.48  | 4.2         |                                      |                  |                                          |
